# Supplementary material for: KLF4, DAPK1 and SPG20 promoter methylation is not affected by DNMT1 silencing and hypomethylating drugs in lymphoma cells
Source: PubMed Central journal article supplement — Oncol Rep. 2021 Nov 8;47(1):10. doi: 10.3892/or.2021.8221 (PMC8600396; doi:10.3892/or.2021.8221), 2021-11-08
Supplement: Supplementary_Data.pdf [file Supplementary_Data.pdf]

Figure S1. Caspase-3/7 activation by 5AZA and decitabine. Fluorescence microscopy (IncuCyte S3) showing caspase-3/7 activation (green cells) in both cell lines treated with either 5AZA or decitabine after 24 h of incubation (n=3). 5AZA, 5'-aza-cytidine; decitabine, 5'-aza-2-deoxycytidine; NT, not treated.

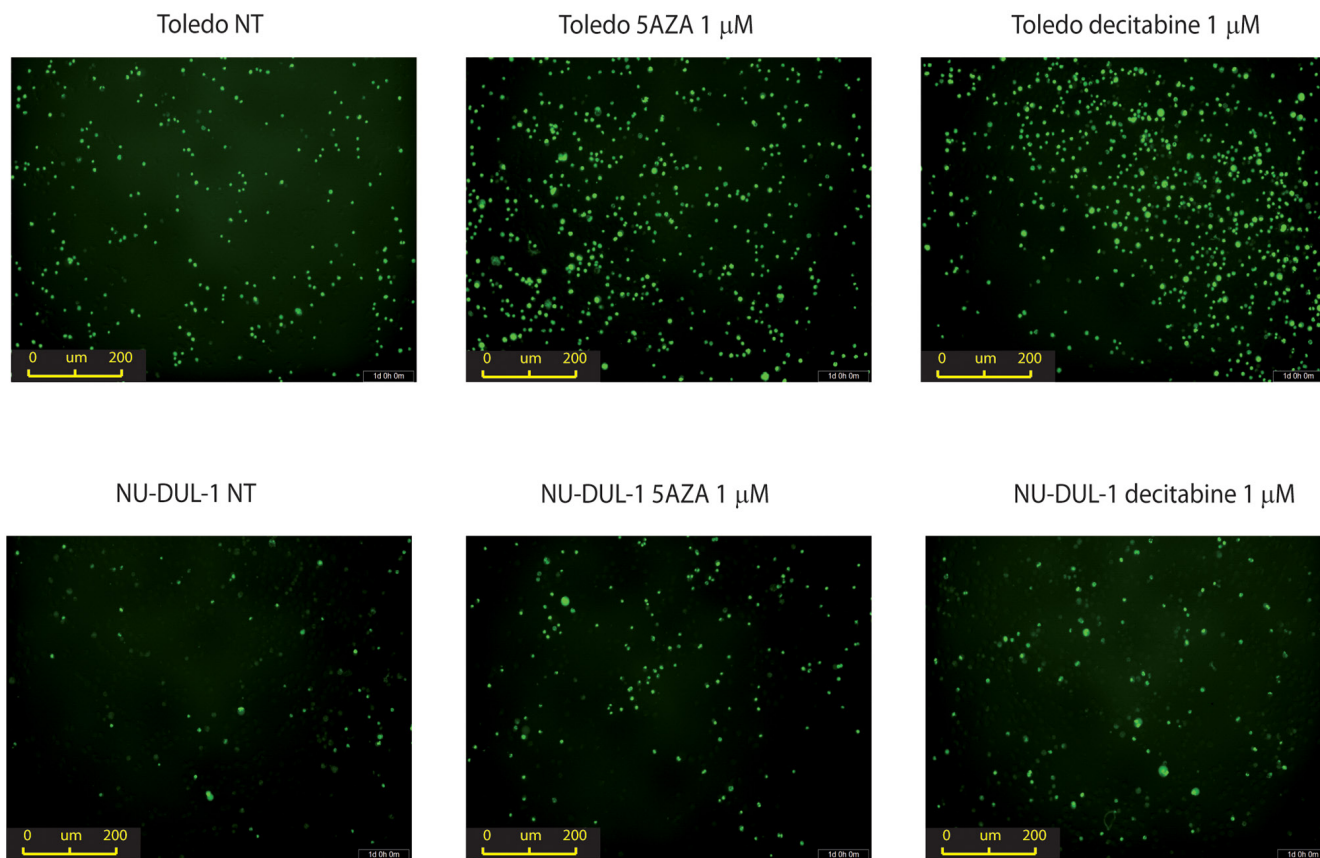

Figure S2. Analysis of the  $\beta$ -values for *SPG20* locus determined by HumanMethylation 27 BeadChip. Data available on 'ArrayExpress', reference 14. The heatmap represents data mining for HCT116 cells either untreated or treated with 5AZA or decitabine.  $\beta$ -values are comprised in the range of 0.7-0.96. 5AZA, 5'-aza-cytidine; decitabine, 5'-aza-2-deoxycytidine; SPG20, spastic paraplegia 20.

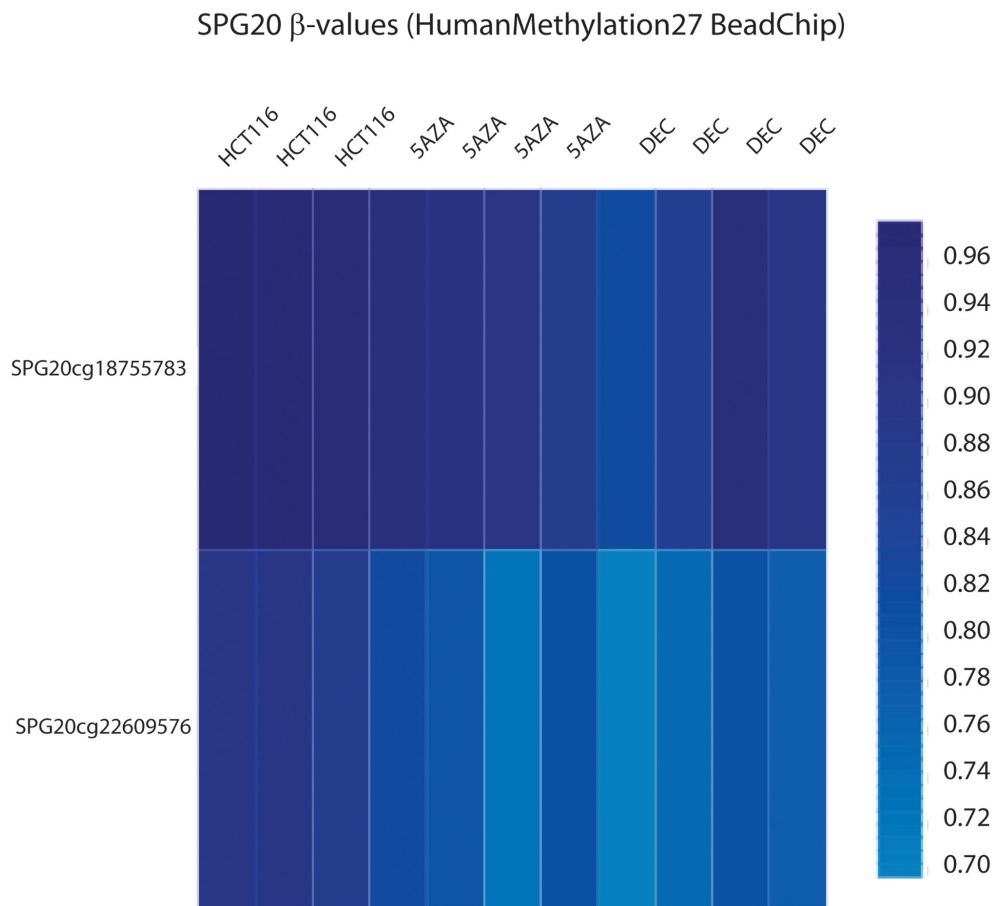

Table SI. Primer sequences for MS-PCR, RT-qPCR and silencing experiments.

| A, MS-PCR primers             |                                                                                                                                      |
|-------------------------------|--------------------------------------------------------------------------------------------------------------------------------------|
| Target                        | Sequences                                                                                                                            |
| cg15754752                    | CTGGCAAAGGCAGCCTTGCAGCTGGGGCCAGGGTCTGTGGTGC<br>TGATCCATCTGCTGGGC[CG]TCACCTCCCGAGAGAGCGTGTGTT<br>CCTCCAACCACGCGTGTCTTAGCACCAGTCTCTGGC |
| M-specific primers<br>(80 bp) | F: 5'-TTGATTTATTTGTTGGGTC-3'                                                                                                         |
|                               | R: 5'-ACTAATACTAAAACACGCG-3'                                                                                                         |
| U-specific primers<br>(80 bp) | F: 5'-TTGATTTATTTGTTGGGTT-3'                                                                                                         |
|                               | R: 5'-ACTAATACTAAAACACACA-3'                                                                                                         |
| B, RT-qPCR primers            |                                                                                                                                      |
| Target                        | Sequences                                                                                                                            |
| DNMT1                         | F: 5'-ATGGGCTATCAGTGCACCTT-3'                                                                                                        |
|                               | R: 5'-CAGAGGGAGCTTCTCTCCAG-3'                                                                                                        |
| DNMT3a                        | F: 5'-AAGGAGGAGCGCCAAGAG-3'                                                                                                          |
|                               | R: 5'-GGATGGGGACTTGGAGATCA-3'                                                                                                        |
| KLF4                          | F: 5'-GTTCCCATCTCAAGGCACAC-3'                                                                                                        |
|                               | R: 5'-CCCCGTGTGTTTACGGTAGT-3'                                                                                                        |
| DAPK1                         | F: 5'-GCAGGAAAACGTGGATGATT-3'                                                                                                        |
|                               | R: 5'-CTCACGGCATTCTTCACAA-3'                                                                                                         |
| SPG20                         | F: 5'-TCCTGGGTACCTTCGAATTG-3'                                                                                                        |
|                               | R: 5'-TAGGCTCCCGCAGTACATT-3'                                                                                                         |
| RPS7                          | F: 5'-TTCTGCCTAAGCCAACCTCGAAAA-3'                                                                                                    |
|                               | R: 5'-CGGATTCTCTTGCCCAACAATTTC-3'                                                                                                    |
| C, siRNA                      |                                                                                                                                      |
| Target                        | Sequences                                                                                                                            |
| DNMT1                         | Sense: 5'-GGUGUGCAUUGAUGCGGAAtt-3'                                                                                                   |
|                               | Antisense: 5'-UUCCGCAUCAAUUGCACACctt-3'                                                                                              |
| DNMT1                         | Sense: 5'-GGAUGAGAAGAGACGUAGAtt-3'                                                                                                   |

|        |                                        |
|--------|----------------------------------------|
|        | Antisense: 5'-UCUACGUCUCUUCUCAUCCTg-3' |
| DNMT3a | Sense: 5'-CCUCAGAGCUAUAACCCAAAtt-3'    |
|        | Antisense: 5'-UUGGGUAAUAGCUCUGAGGcg-3' |

F, forward; R, reverse; MS-PCR, methylation-specific PCR; RT-qPCR, reverse transcription-quantitative PCR; M, methylated; U, unmethylated; DNMT, DNA methyltransferase; KLF4, Krüppel-like factor 4; DAPK1, death associated protein 1; SPG20, spastic paraplegia 20; RPS7, ribosomal protein S7; siRNA, small interfering RNA.

Table SII. Amplification conditions for MS-PCR and RT-qPCR.

| A, MS-PCR conditions |                 |                   |
|----------------------|-----------------|-------------------|
| Step                 | Temperature, °C | Time              |
| 1                    | 95              | 5 min             |
| 2 <sup>a</sup>       | 94              | 30 sec            |
| 3                    | 51              | 1 min             |
| 4                    | 72              | 1 min             |
| 5                    | 72              | 5 min             |
| 6                    | 4               | 30 min            |
| B, qPCR conditions   |                 |                   |
| Step                 | Temperature, °C | Time              |
| 1                    | 98              | 2 min             |
| 2 <sup>b</sup>       | 98              | 2 sec             |
| 3                    | 56              | 5 sec             |
| 4                    | 70-95           | melt curve, 0.5°C |

<sup>a</sup>Steps 2-4 were repeated 34 times; <sup>b</sup>steps 2-3 were repeated 39 times. MS-PCR, methylation-specific PCR; qPCR, quantitative PCR.

Table SIII. CpG island positions of the EpiTect Methyl II qPCR used for quantitative methylation.

| PCR Primer Assay Kit             | CpG Island | Chr position             |
|----------------------------------|------------|--------------------------|
| PCR Primer Assay for Human KLF4  | 114531     | Chr9:110249748-110252660 |
| PCR Primer Assay for Human DAPK1 | 114427     | Chr9:90112514-90113817   |
| PCR Primer Assay for Human SPG20 | 103708     | Chr13:36919737-36921004  |

Assays were designed by Qiagen, Inc., on NCBI Homo sapiens Build Number:37 version 2. Chr, chromosome.

Table SIV. Cq values of DNMT3a expression as determined by reverse transcription-quantitative PCR.

| A, NU-DUL-1 cells |                |         |          |                       |
|-------------------|----------------|---------|----------|-----------------------|
| Mock              | Scramble siRNA | siDNMT1 | siDNMT3a | siDNMT1 +<br>siDNMT3a |
| 34.36             | 34.64          | 34.77   | 35.16    | 34.72                 |
| 34.61             | 34.67          | 34.57   | 35.02    | 34.47                 |
| 34.54             | 34.91          | 35.01   | 35.43    | 34.58                 |
| 33.47             | 34.19          | 35.06   | 35.08    | 32.58                 |
| 33.54             | 34.07          | 34.95   | 34.82    | 32.71                 |
| 33.92             | 34.45          | 35.12   | 34.52    | 32.95                 |
|                   | 33.30          | 35.57   | 34.89    | 36.19                 |
|                   | 33.35          |         | 35.13    | 36.14                 |
|                   | 33.55          |         | 34.95    | 35.99                 |
| B, Toledo cells   |                |         |          |                       |
| Mock              | Scramble siRNA | siDNMT1 | siDNMT3a | siDNMT1 +<br>siDNMT3a |
| 36.85             | 34.91          | 35.08   | 36.79    | 35.37                 |
| 36.54             | 34.93          | 35.38   | 35.81    | 35.48                 |
| 36.09             | 35.50          | 35.29   | 36.21    | 35.55                 |
| 34.53             | 35.01          | 35.00   | 35.72    | 35.23                 |
| 34.38             | 34.76          | 35.00   | 35.59    | 35.14                 |
| 34.02             | 35.24          | 34.93   | 36.11    | 35.45                 |
|                   | 33.78          | 33.65   | 35.18    | 34.12                 |
|                   | 33.49          | 33.47   | 34.32    | 34.34                 |
|                   | 33.57          | 33.67   | 34.93    | 34.73                 |

The results of the experiments after 48 h of incubation from transfection are shown. DNMT, DNA methyltransferase; si/siRNA, small interfering RNA.
